# Supplementary material for: Biparatopic nanobodies protect mice from lethal challenge with SARS‐CoV‐2 variants of concern
Source: PubMed Central journal article supplement (PMC8811630; doi:10.15252/embr.202153865), 2021-12-20
Supplement: EMBR-23-e53865-s003.pdf [file EMBR-23-e53865-s003.pdf]

1 **Appendix:**

2 **Biparatopic Nanobodies protect mice from lethal challenge with SARS-CoV-2**  
3 **variants of concern**

4  
5 Teresa R. Wagner<sup>1,2\*</sup>, Daniel Schnepf<sup>3\*</sup>, Julius Beer<sup>3\*</sup>, Natalia Ruetalo<sup>4\*</sup>, Karin Klingel<sup>5</sup>, Philipp  
6 D. Kaiser<sup>2</sup>, Daniel Junker<sup>2</sup>, Martina Sauter<sup>5</sup>, Bjoern Traenkle<sup>2</sup>, Desiree I. Frecot<sup>1,2</sup>, Matthias  
7 Becker<sup>2</sup>, Nicole Schneiderhan-Marra<sup>2</sup>, Annette Ohnemus<sup>3</sup>, Martin Schwemmle<sup>3,6</sup>, Michael  
8 Schindler<sup>4</sup>, Ulrich Rothbauer<sup>1,2,7#</sup>

9

10 Addresses

11 <sup>1</sup> Pharmaceutical Biotechnology, Eberhard Karls University, Tübingen, Germany

12 <sup>2</sup> NMI Natural and Medical Sciences Institute at the University of Tübingen, Reutlingen, Germany

13 <sup>3</sup> Institute of Virology, Medical Center University Freiburg, Freiburg, Germany

14 <sup>4</sup> Institute for Medical Virology and Epidemiology of Viral Diseases, University Hospital Tübingen,  
15 Tübingen, Germany

16 <sup>5</sup> Institute for Pathology and Neuropathology, University Hospital Tübingen, Tübingen, Germany

17 <sup>6</sup> Faculty of Medicine, University of Freiburg, Freiburg, Germany

18 <sup>7</sup> Cluster of Excellence iFIT (EXC2180) "Image-Guided and Functionally Instructed Tumor  
19 Therapies", Eberhard Karls University, Tübingen, Germany

20

21 \* authors contributed equally to this work

22 # corresponding author

23

24 Correspondence:

25 Prof. Dr. Ulrich Rothbauer, NMI Natural and Medical Sciences Institute at the University of  
26 Tübingen

27 Markwiesenstr. 55, 72770 Reutlingen, Germany.

28 E-mail: [ulrich.rothbauer@uni-tuebingen.de](mailto:ulrich.rothbauer@uni-tuebingen.de)

29 Phone: +49 7121 51530-415

30 Fax: +49 7121 51530-816

31 Orcid ID: 0000-0001-5923-8986

32

33

|    |                                                     |          |
|----|-----------------------------------------------------|----------|
| 34 | <b>Table of Content</b>                             |          |
| 35 |                                                     |          |
| 36 | <b>Appendix Tables.....</b>                         | <b>4</b> |
| 37 | Appendix Table S1. Nb combinations for bipNbs ..... | 4        |
| 38 | Appendix Table S2. Primer Sequences.....            | 5        |
| 39 |                                                     |          |
| 40 |                                                     |          |

41 **Appendix Tables**

42 **Appendix Table S1. Nb combinations for bipNbs**

| <b>Biparatopic (Bip)/ bivalent Nb</b> | <b>Single Nb combination</b>                   |
|---------------------------------------|------------------------------------------------|
| NM1267                                | NM1230-(G <sub>4</sub> S) <sub>4</sub> -NM1226 |
| NM1268                                | NM1228-(G <sub>4</sub> S) <sub>4</sub> -NM1226 |
| NM1251 (Control)                      | Pep-Nb-(G <sub>4</sub> S) <sub>4</sub> -Pep-Nb |

43

44

45 **Appendix Table S2. Primer Sequences**

| <b>Primer</b> | <b>Sequence 5'-3'</b>                                            |
|---------------|------------------------------------------------------------------|
| NM1228Nfor    | GGACGTCTCAACTCTGACGTGCAGCTGGTGGAAAT                              |
| NM1228Nrev    | CACCACCGCCAGATCCACCGCCACCTGATCCTCCGCCTCCTGAGGACACGGTGACCAGGGACCC |
| NM1226Cfor    | GGTGGATCTGGCGGTGGTGGAAAGTGGTGGCGGAGGTAGTCAGGTGCAGCTGGTGGAAAT     |
| NM1226Crev    | GGGGAATTCAGTGATGGTGATGGTGGTGTGAGGACACGGTGACCGGGGCC               |
| RBDfor        | ATATCTAGAGCCACCATGTTTCGTGTTTCTGG                                 |
| RBDrev        | AAGATCTGCTAGCTCGAGTCGC                                           |
| N501Yfor      | GGCTTTCAGCCACATATGGCGTGGGCTATCAGC                                |
| N501Yrev      | CCACGCCATATGTGGGCTGAAAGCCGTAG                                    |
| L452Rfor      | GGCAACTACAATTACCGGTACCGGCTGTTCCGGAAG                             |
| L452Rrev      | CGGTACCGGTAATTGTAGTTGCCGCCG                                      |
| V367Ffor      | CGACTACTCCTTCCTGTACAACCTCCGCCAGCTTC                              |
| V367Frev      | CGGAGTTGTACAGGAAGGAGTAGTCGGCCACGCA                               |
| T478Kfor      | CCGGCAGCAAGCCTTGTAACGGCGTGGAAG                                   |
| T478Krev      | CGTTACAAGGCTTGCTGCCGGCCTGATAGA                                   |
| E484Kfor      | GTAACGGCGTGAAAGGCTTCAACTGCTACTTCCC                               |
| E484Krev      | GCAGTTGAAGCCTTTCACGCCGTTACAAGGGGT                                |
| K417Nfor      | GACAGACAGGCAACATCGCCGACTACAAC TACAAGC                            |
| K417Nrev      | GTTGTAGTCGGCGATGTTGCCTGTCTGTCCAGGG                               |
| K417Tfor      | GACAGACAGGCACCATCGCCGACTACAAC TACAAG                             |
| K417Trev      | GTTGTAGTCGGCGATGGTGCCTGTCTGTCCAGGGG                              |

46
